# Supplementary material for: Palladacycle catalysis: an innovation to the Suzuki–Miyaura cross-coupling reaction
Source: Royal Society of Chemistry journal article supplement (doi:10.1039/c6dt03542f), 2016-01-01
Supplement: c6dt03542f1.pdf [file c6dt03542f1.pdf]

## Experimental

**4-B(OH)<sub>2</sub>C<sub>6</sub>H<sub>4</sub>C(Me)=NN(H)C(=S)NHMe (a).** 4-Acetylphenylboronic acid (671 mg, 4.09 mmol) and hydrochloric acid (35%, 0.65 cm<sup>3</sup>) were added to a suspension of 4-methyl-3-thiosemicarbazide (430 mg, 4.09 mmol) in water (40 cm<sup>3</sup>) to give a clear solution, which was stirred at room temperature for 4 h. The white solid formed was filtered off, washed with cold water, and dried in *vacuo*. Yield: 924 mg, 90%. Anal. Found: C, 47.8; H, 5.6; N, 16.8; S, 12.7 %; C<sub>10</sub>H<sub>14</sub>BN<sub>3</sub>O<sub>2</sub>S (251.11 g/mol) requires C, 47.8; H, 5.6; N, 16.7; S, 12.8 %. IR(cm<sup>-1</sup>): ν(N-H) 3314, 3341; ν(C=N) 1570; ν(C=S) 831, ν(O-H) 3500; ν(B-O) 1363. <sup>1</sup>H NMR (DMSO): 2.29 (s, 3H, Me); 3.04 (d, 3H, NHCH<sub>3</sub>, <sup>3</sup>J(NHMe) = 4.2Hz); 7.80 (m, 2H, H<sub>3</sub>, H<sub>5</sub>, *N* = 8.3Hz); 7.90 (m, 2H, H<sub>2</sub>, H<sub>6</sub>, *N* = 8.3Hz); 8.12 (s, 2H, B(OH)<sub>2</sub>); 8.47 (b, 1H, NHMe); 10.23 (bs, 1H, NH).

**[Pd{4-B(OH)<sub>2</sub>C<sub>6</sub>H<sub>3</sub>C(Me)=NN=C(S)NHMe}]<sub>4</sub> (1).** To a stirred solution of potassium tetrachloropalladate (114 mg, 0.35 mmol) in water (6 cm<sup>3</sup>) was added ethanol (40 cm<sup>3</sup>). The resulting fine yellow suspension was treated with ligand **a** (88 mg, 0.35 mmol). The mixture was stirred for 24h at room temperature. The yellow precipitate was filtered off, washed with ethanol and dried. Yield: 105mg (89%). Anal. Found: C: 33.7; H: 3.3; N: 11.9; S: 8.9 %; C<sub>40</sub>H<sub>48</sub>N<sub>12</sub>B<sub>4</sub>O<sub>8</sub>S<sub>4</sub>Pd<sub>4</sub> (1422.08 g/mol) requires C: 33.8; H: 3.4; N: 11.8; S: 9.0 %. IR(cm<sup>-1</sup>): ν(C=N) 1583; ν(N-H) 3256; ν(O-H) 3431; ν(B-O) 1382. <sup>1</sup>H NMR (DMSO): 2.28 (s, 12H, Me); 2.84 (d, 12H, NHCH<sub>3</sub>, <sup>3</sup>J(NHMe) = 4.6Hz); 6.50 (bs, 4H, NHMe); 6.68 (d, 4H, H<sub>3</sub>, <sup>3</sup>J(H<sub>3</sub>H<sub>2</sub>) = 7.6Hz); 7.33 (d, 4H, H<sub>2</sub>, <sup>3</sup>J(H<sub>2</sub>H<sub>6</sub>) = 7.6Hz); 7.61 (s, 8H, B(OH)<sub>2</sub>); 7.79 (s, 4H, H<sub>5</sub>).

**[Pd{4-B(OH)<sub>2</sub>C<sub>6</sub>H<sub>3</sub>C(Me)=NN=C(S)NHMe}{PPh<sub>3</sub>}] (3).** The phosphine PPh<sub>3</sub> (42 mg, 1.2 mmol) was added to a suspension of complex **1** (57mg, 0.040 mmol) in acetone (20 cm<sup>3</sup>). The mixture was stirred for 24h. The resulting yellow solid was filtered off and dried. Yield: 20 mg (80 %). Anal. Found: C, 54.2; H, 4.3; N, 6.6; S, 5.4 %, C<sub>28</sub>H<sub>27</sub>N<sub>3</sub>BO<sub>2</sub>SPPd (617.18 g/mol) requires C, 54.4; H, 4.4; N, 6.8; S, 5.2 %. IR(cm<sup>-1</sup>): ν(C=N) 1588; ν(N-H) 3284; ν(O-H) 3398; ν(B-O) 1371. <sup>1</sup>H NMR (CDCl<sub>3</sub>): 2.25 (s, 3H, Me); 2.91 (d, 3H, NHCH<sub>3</sub>, <sup>3</sup>J(NHMe) = 4.6Hz); 6.92 (bs, 1H, NHMe); 6.98 (d, 1H, H<sub>3</sub>, <sup>3</sup>J(H<sub>3</sub>H<sub>2</sub>) = 7.6Hz); 7.14 (s, 1H, H<sub>5</sub>); 7.25 (d, 1H, H<sub>2</sub>); 7.33-7.70 (m, 15H, PPh<sub>3</sub>); 7.93 (s, 2H, B(OH)<sub>2</sub>). <sup>31</sup>P RMN (CDCl<sub>3</sub>): 36.58 (s, PPh<sub>3</sub>).

**[Pd{4-(4-MeC(=O)C<sub>6</sub>H<sub>4</sub>)C<sub>6</sub>H<sub>3</sub>C(Me)=NN=C(S)NHMe}{PPh<sub>3</sub>}] (4).** Method **I**: To a stirred solution of compound **3** (39 mg, 0.06 mmol) in dry THF (10 cm<sup>3</sup>) 4-bromoacetophenone (24 mg, 0.12 mmol), K<sub>3</sub>PO<sub>4</sub> (51 mg, 0.24 mmol) and [Pd(PPh<sub>3</sub>)<sub>4</sub>] (58 mg, 0.005 mmol) were added and the mixture was refluxed for 24h. After cooling to room temperature water (10 cm<sup>3</sup>) was added and the mixture was extracted with dichloromethane (2 x 20 cm<sup>3</sup>). The combined extracts were dried over MgSO<sub>4</sub> and the solvent removed under vacuum. The residue was chromatographed on a column packed with silica gel. Elution with dichloromethane/methanol (2%) afforded the final product after concentration, as a yellow crystalline solid. The yellow precipitate was filtered off, washed with ethanol and dried. Yield: 15 mg, 36 %. Method **II**: An analogous procedure to that of method **I** was followed albeit without addition of [Pd(PPh<sub>3</sub>)<sub>4</sub>]. The resulting mixture was stirred for 15 min. at room temperature and refluxed for a further 30 minutes; the resulting crystals of **4** were separated by filtration. Anal. found: C, 62.7; H, 4.8; N, 6.0; S, 4.7 %, C<sub>36</sub>H<sub>32</sub>N<sub>3</sub>OSPPd (692.12 g/mol) requires C, 62.5; H, 4.7; N, 6.1; S, 4.6 %. IR(cm<sup>-1</sup>):  $\nu_{C=N}$ : 1593,  $\nu_{N-H}$ : 3321,  $\nu_{O-H}$ :3386,  $\nu_{(B-O)}$ : 1353. <sup>1</sup>H NMR (CDCl<sub>3</sub>): 2.43 (s, 3H, Me); 2.55 (s, 3H, COCH<sub>3</sub>); 2.96 (d, 3H, NHCH<sub>3</sub>, <sup>3</sup>J(NHMe) = 4.9Hz); 4.75 (b, 1H, NHMe); 6.60 (d, 1H, H3, <sup>3</sup>J(H3H2) = 7.6Hz); 6.82 (m, 2H, H12, H16, *N* = 8.3Hz); 7.14 (s, 1H, H5); 7.35-7.79 (m, 15H, PPh<sub>3</sub>); 8.06 (m, 2H, H13, H15, *N* = 8.3Hz). <sup>31</sup>P-<sup>1</sup>H} RMN (CDCl<sub>3</sub>): 37.89 (s, 1P, PPh<sub>3</sub>).

**X-ray Crystallographic Study:** Three-dimensional, room temperature X-ray data were collected on a Siemens Smart CCD diffractometer by the  $\omega$  scan method using graphite-monochromated Mo-K $\alpha$  radiation. All the measured reflections were corrected for Lorentz and polarisation effects and for absorption by semi-empirical methods based on symmetry-equivalent and repeated reflections. The structures were solved by direct methods and refined by full matrix least squares on *F*<sup>2</sup>. Hydrogen atoms were included in calculated positions and refined in riding mode. Refinement converged at a final *R* = 0.0353 and *wR*<sub>2</sub> = 0.0721, with allowance for thermal anisotropy of all non-hydrogen atoms. A molecule of solvent was proven to be indeterminate as both THF and DCM were used in the preparation. Therefore PLATON Squeeze was used to create a solvent mask of 47e. this equates to approximately C<sub>2</sub> H<sub>4</sub> O<sub>1</sub>.

The structure solution and refinement were carried out using the program package SHELXS-97 and SHELXL-2013, respectively.

## Crystallographic study:

**Table 1.** Crystal and structure refinement data for compound **4**.

|                                   |                                             |                               |
|-----------------------------------|---------------------------------------------|-------------------------------|
| Identification code               | vi201a1n_sq_s                               |                               |
| Empirical formula                 | C38 H36 N3 O2 P Pd S                        |                               |
| Formula weight                    | 736.13                                      |                               |
| Temperature                       | 293(2) K                                    |                               |
| Wavelength                        | 0.71073 Å                                   |                               |
| Crystal system                    | Triclinic                                   |                               |
| Space group                       | P-1                                         |                               |
| Unit cell dimensions              | a = 10.7093(13) Å                           | $\alpha = 107.932(2)^\circ$ . |
|                                   | b = 11.0603(13) Å                           | $\beta = 95.926(2)^\circ$ .   |
|                                   | c = 15.9546(19) Å                           | $\gamma = 104.175(2)^\circ$ . |
| Volume                            | 1710.2(4) Å <sup>3</sup>                    |                               |
| Z                                 | 2                                           |                               |
| Density (calculated)              | 1.429 Mg/m <sup>3</sup>                     |                               |
| Absorption coefficient            | 0.688 mm <sup>-1</sup>                      |                               |
| F(000)                            | 756                                         |                               |
| Crystal size                      | 0.54 x 0.1 x 0.05 mm <sup>3</sup>           |                               |
| Theta range for data collection   | 1.999 to 26.021°.                           |                               |
| Index ranges                      | -13<=h<=13, -13<=k<=13, -19<=l<=19          |                               |
| Reflections collected             | 6711                                        |                               |
| Independent reflections           | 6711 [R(int) = 0.0402]                      |                               |
| Completeness to theta = 25.242°   | 99.8 %                                      |                               |
| Absorption correction             | Semi-empirical from equivalents             |                               |
| Max. and min. transmission        | 0.91 and 0.65                               |                               |
| Refinement method                 | Full-matrix least-squares on F <sup>2</sup> |                               |
| Data / restraints / parameters    | 6711 / 0 / 392                              |                               |
| Goodness-of-fit on F <sup>2</sup> | 1.000                                       |                               |
| Final R indices [I>2sigma(I)]     | R1 = 0.0353, wR2 = 0.0721                   |                               |
| R indices (all data)              | R1 = 0.0651, wR2 = 0.0817                   |                               |
| Extinction coefficient            | n/a                                         |                               |
| Largest diff. peak and hole       | 0.372 and -0.517 e.Å <sup>-3</sup>          |                               |

**Table 2.** Selected bond distances (Å) and angles (°) for compound **4**.

|                 |            |
|-----------------|------------|
| Pd(1)-C(1)      | 2.020(3)   |
| Pd(1)-N(1)      | 2.028(2)   |
| Pd(1)-P(1)      | 2.2520(9)  |
| Pd(1)-S(1)      | 2.3484(9)  |
| S(1)-C(5)       | 1.764(3)   |
| N(1)-C(3)       | 1.295(4)   |
| N(1)-N(2)       | 1.390(3)   |
| N(2)-C(5)       | 1.303(4)   |
| N(3)-C(5)       | 1.346(4)   |
| N(3)-C(6)       | 1.447(4)   |
| O(1)-C(10)      | 1.233(4)   |
| C(1)-C(2)       | 1.414(4)   |
| C(2)-C(3)       | 1.457(4)   |
| C(3)-C(4)       | 1.496(4)   |
| C(7)-C(8)       | 1.477(4)   |
| C(9)-C(10)      | 1.464(5)   |
| C(10)-C(11)     | 1.493(6)   |
|                 |            |
| C(1)-Pd(1)-N(1) | 80.60(11)  |
| C(1)-Pd(1)-P(1) | 94.68(9)   |
| N(1)-Pd(1)-S(1) | 82.78(8)   |
| P(1)-Pd(1)-S(1) | 101.95(3)  |
| C(5)-S(1)-Pd(1) | 94.18(11)  |
| C(3)-N(1)-N(2)  | 119.3(3)   |
| C(3)-N(1)-Pd(1) | 117.3(2)   |
| N(2)-N(1)-Pd(1) | 123.33(19) |
| C(5)-N(2)-N(1)  | 112.3(3)   |
| N(1)-C(3)-C(2)  | 114.0(3)   |

|                  |          |
|------------------|----------|
| N(1)-C(3)-C(4)   | 123.1(3) |
| C(2)-C(3)-C(4)   | 122.9(3) |
| C(5)-N(3)-C(6)   | 123.5(3) |
| C(1)-C(2)-C(3)   | 116.6(3) |
| N(2)-C(5)-N(3)   | 117.3(3) |
| N(2)-C(5)-S(1)   | 127.4(2) |
| N(3)-C(5)-S(1)   | 115.3(3) |
| O(1)-C(10)-C(11) | 119.8(4) |
| C(9)-C(10)-C(11) | 120.2(4) |

## Computational details

The overall reaction studied was:

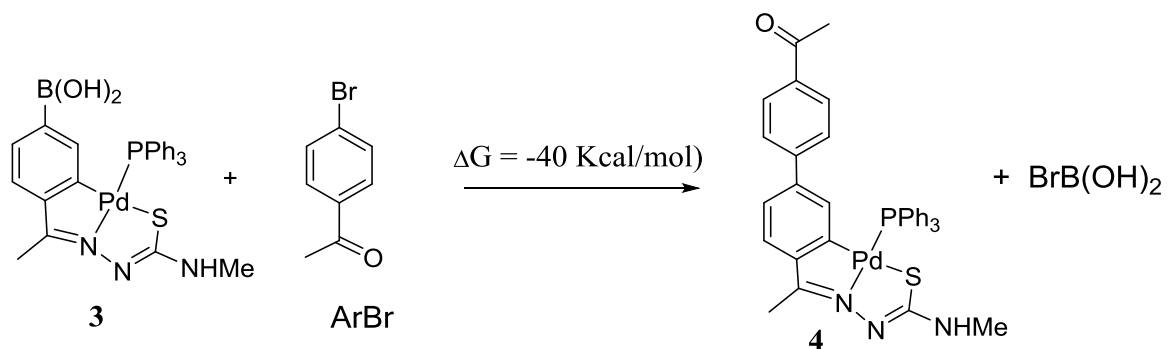

All the components which were optimized to ground state with the Gaussian g09<sup>1</sup> package of programs (M06/ ECP28MDF\_GUESS<sup>2</sup>/6-31G(d)).

## Structures obtained

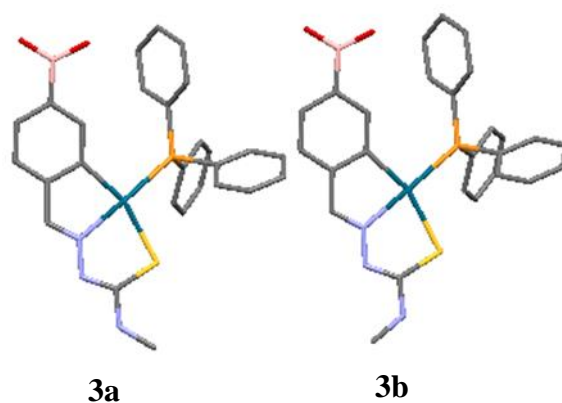

**Figure 1.-** **3b** is slightly more stable than **3a** by 1.13 Kcal/mol.

<sup>1</sup> M. J. Frisch *et al.* *Gaussian 09*, Revision D.01; Gaussian, Inc., Wallingford CT, **2013**.

<sup>2</sup> K. A. Peterson, D. Figgen, M. Dolg, H. Stoll, *J. Chem. Phys.* **2007** *126*, 124101.

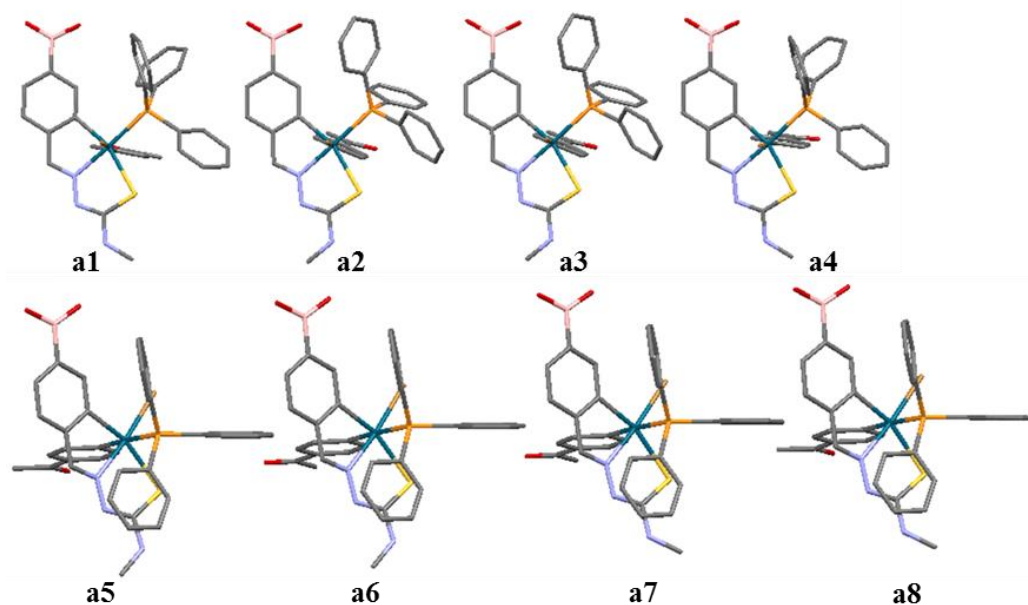

**Figure 2.-** The eight conformers derived from **a**. The most stable one is **a6**, as shown in Table 3.

**Table 3.-** Related energies to the most stable conformer (**a6**)

| Compound  | Energy/(Kcal/mol) |
|-----------|-------------------|
| <b>a6</b> | 0                 |
| <b>a5</b> | 0,29806725        |
| <b>a7</b> | 1,10755515        |
| <b>a8</b> | 1,47841356        |
| <b>a2</b> | 9,64796625        |
| <b>a3</b> | 10,04831763       |
| <b>a4</b> | 10,05082767       |
| <b>a1</b> | 10,6583201        |

The results show that the energy difference between the species with the same conformation (*cis*- or *trans*-) is *ca.* 1 Kcal/mol, thus being nearly isoenergetic. The difference of 10 Kcal/mol between the *cis*- and the *trans*- conformers corroborates our assumption of a *cis*-fashion addition.

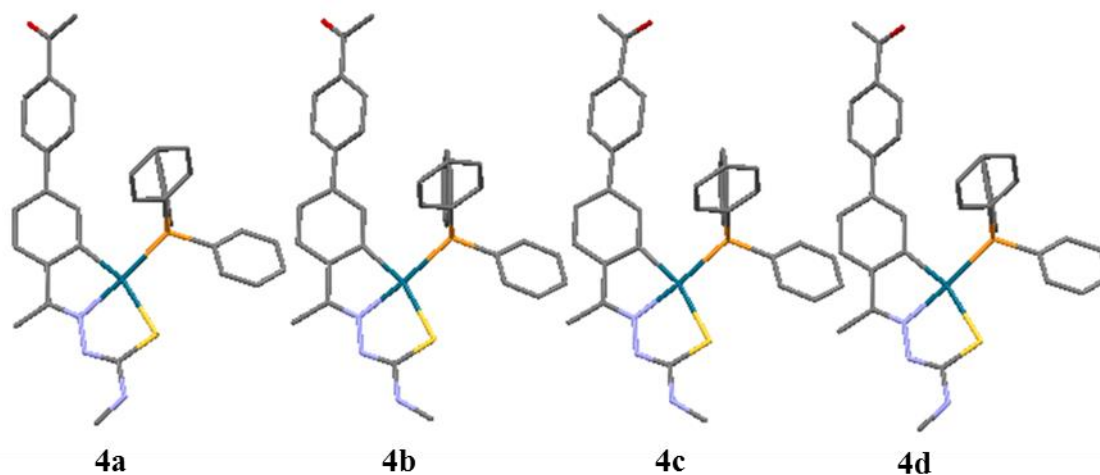

**Figure 3.-** The four conformers derived from **4**. The most stable one is **4d**, as shown in Table 4.

**Table 4.-** Related energies to the most stable conformer (**4d**)

| Compound  | Energy/(Kcal/mol) |
|-----------|-------------------|
| <b>4d</b> | 0                 |
| <b>4a</b> | 0,298067          |
| <b>4c</b> | 0,968875          |
| <b>4b</b> | 1,146461          |

### Crystallographic data comparison

In the case of compound **4**, suitable crystals for X-ray diffraction were obtained. In order to compare the crystal structure with the conformers studied, the results showed that the structure matches conformer **4d**; this is in accordance with the experimental data, and shows the wellness of the model.



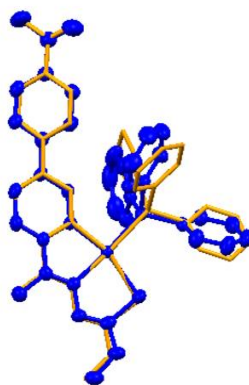

---

**Figure 4.-** Comparison of the DFT optimized conformer **4d** (orange) and the crystal structure (blue) for **4**.
